# Supplementary material
Source: PubMed Central journal article supplement (PMC9674754)
Supplement: 10875_2022_1314_MOESM1_ESM.pdf [file 10875_2022_1314_MOESM1_ESM.pdf]

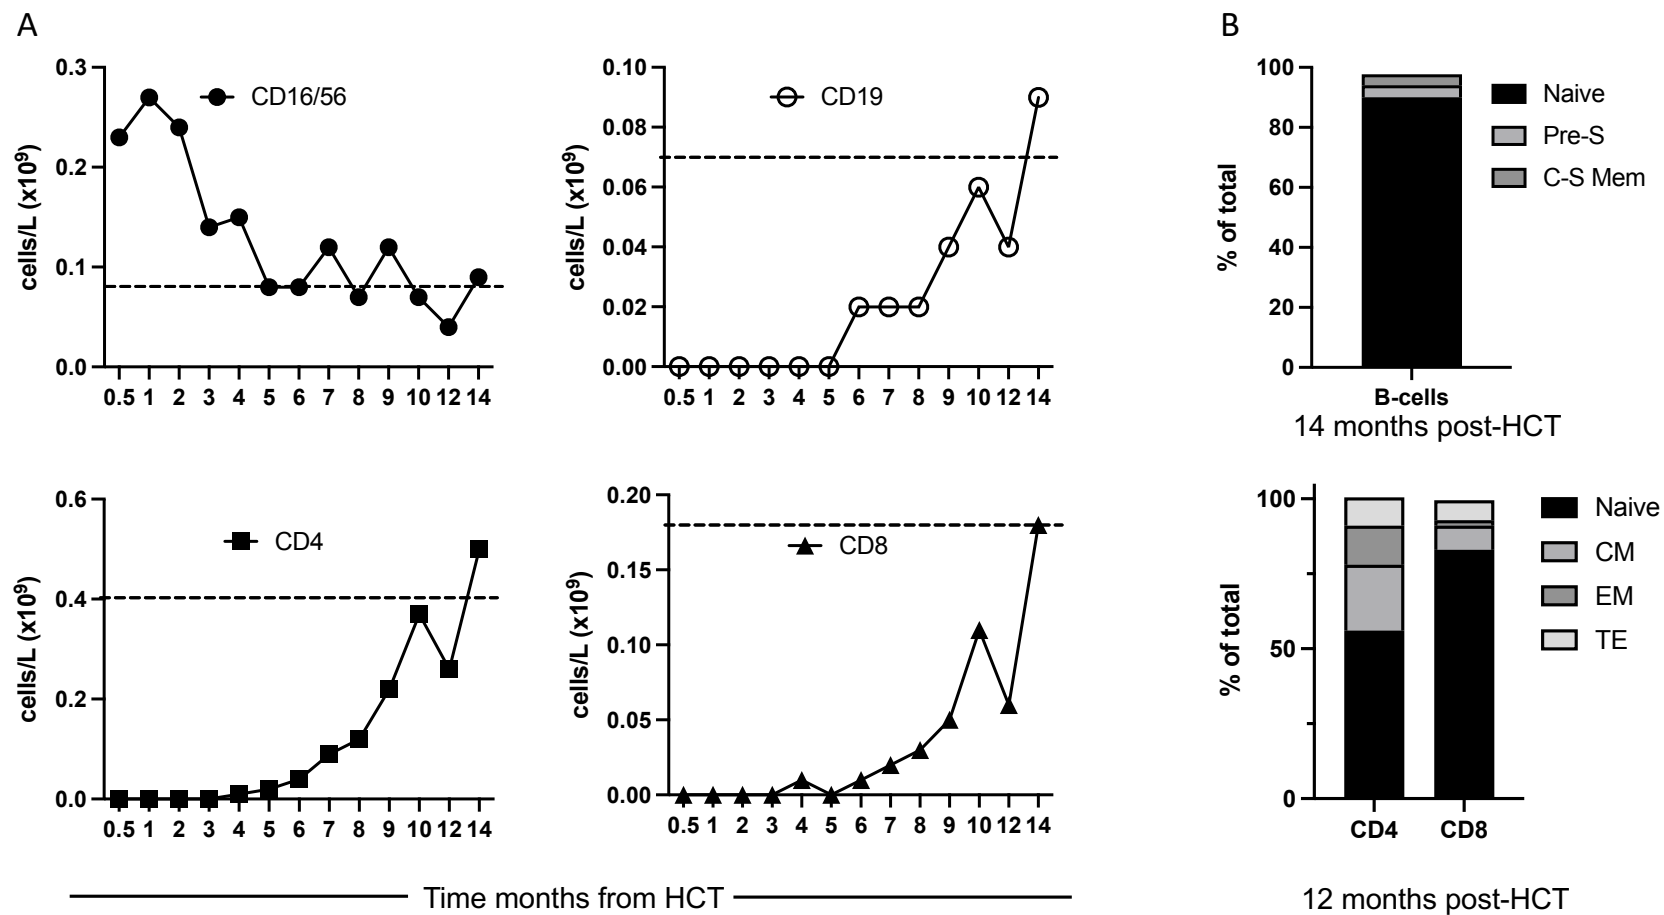

**Supplementary Figure 1.** Immune reconstitution after HCT. A) Absolute levels of CD16/56 NK-cells, CD19 B-cells, CD4 T-cells and CD8 T-cells at indicated time-points after HCT. The dashed horizontal lines indicates the lower normal limit. B. Composition of B- (upper) and T-cell(lower) subsets at 14 and 12 months after HCT, respectively. Pre-S Pre-switch; C-S Mem Class-switch memory; CM Central memory; EM Effector memory; TE Terminal effector
